# Supplementary material for: Interplay between Humoral and CLA+ T Cell Response against Candida albicans in Psoriasis
Source: PubMed Central journal article supplement (PMC7913574; doi:10.3390/ijms22041519), 2021-02-03
Supplement: ijms-22-01519-s001.pdf [file ijms-22-01519-s001.pdf]

## SUPPORTING INFORMATION

**Figure S1. Quantitative measurement of anti-CA IgA plasma levels with a commercial ELISA kit validate our results.** Plasma from psoriasis (n=52, ●) and healthy controls (n=15, ○) were tested in *Candida albicans* IgA ELISA kit from IBL-international according to manufacture instructions. Differences in anti-CA IgA titers quantified with the commercial kit were analysed according disease type: plaque (n=31) and guttate (n=21). Dotted line indicates the limit of detection for positive results on *Candida albicans* fresh infection. Mann-Whitney test was used to compare two groups and p values are indicated as \*: p<0.05.

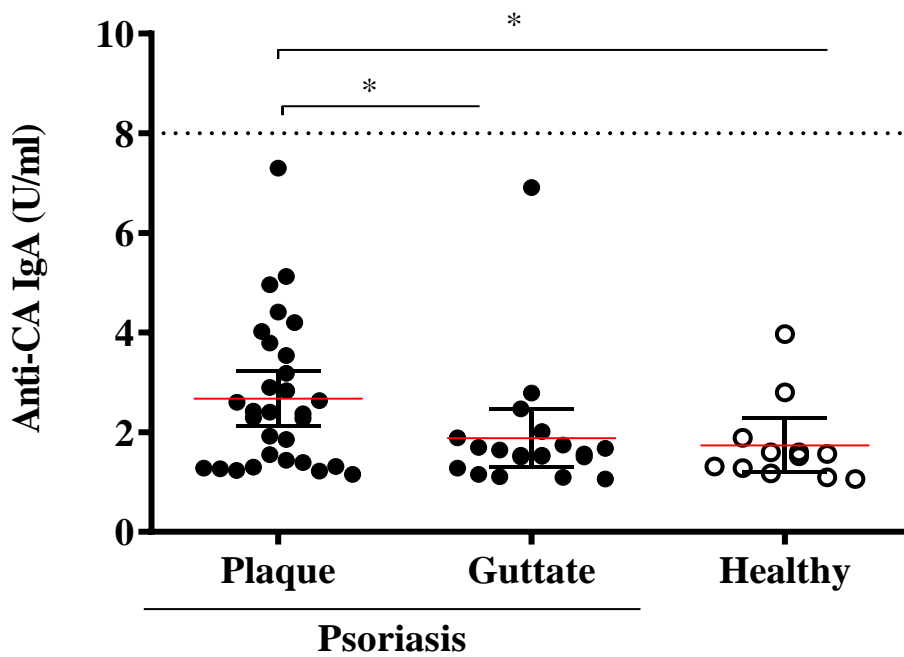



**Figure S3. Correlations between CCL18, CHI3L1 and AZU1 plasma levels with disease severity and onset in psoriasis.** Levels of CCL18, CHI3L1 and AZU1 were quantified by commercial ELISA kits on plasma from psoriasis patients (n=52). Association with disease severity, in terms of PASI (a-c), and onset (d-f) was assessed by spearman correlation. Spearman coefficient (r) and p values (p) are reported for each condition.

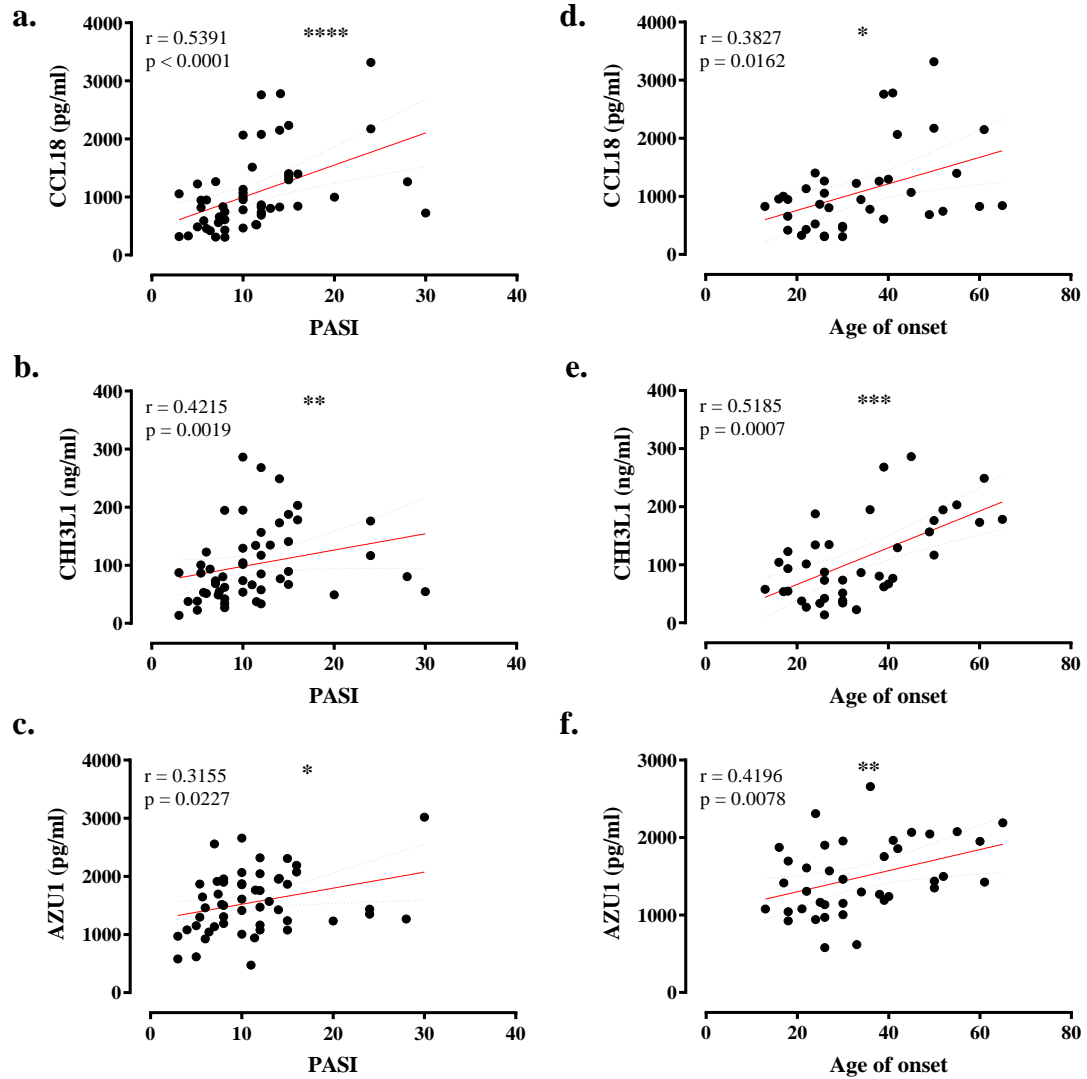

**Table S1. Detailed information on samples from psoriasis and healthy individuals.**

Biopsies from psoriasis patients were performed in skin lesions.

|                                |                 | Sample type    |        | Experiments                                                                                                                                                                          | Hospital / Institution                                                                                                                                                              |
|--------------------------------|-----------------|----------------|--------|--------------------------------------------------------------------------------------------------------------------------------------------------------------------------------------|-------------------------------------------------------------------------------------------------------------------------------------------------------------------------------------|
|                                |                 | Biopsy + blood | Plasma |                                                                                                                                                                                      |                                                                                                                                                                                     |
| <b>Psoriasis (n=166)</b>       | <i>Cohort 1</i> | 52             | 52     | <ul style="list-style-type: none"> <li>• Anti-CA / SE ELISAs</li> <li>• CLA+/- T cells and EPI cocultures</li> <li>• ELISAs for validating proteomic results</li> </ul>              | <ul style="list-style-type: none"> <li>- Hospital del Mar, Barcelona (Spain).</li> <li>- Hospital Arnau de Vilanova de Lleida, Lleida (Spain).</li> <li>- Iasi (Rumania)</li> </ul> |
|                                | <i>Cohort 2</i> | -              | 114    | <ul style="list-style-type: none"> <li>• Anti-CA IgA ELISA</li> <li>• Proteomic profiling</li> </ul>                                                                                 | Incyte Corporation, Clinical Trial NCT00778700                                                                                                                                      |
| <b>Healthy controls (n=17)</b> |                 | 12             | 17     | <ul style="list-style-type: none"> <li>• N=17 Anti-CA/SE ELISAs</li> <li>• N=12 CLA+/- T cells and EPI cocultures</li> <li>• N=17 ELISAs for validating proteomic results</li> </ul> | Hospital del Mar, Barcelona (Spain).                                                                                                                                                |

**Table S2. List of antibodies and concentrations used in the ELISA.**

| <b>Antibody name</b>                                            | <b>Company</b>   | <b>Reference</b> | <b>Dilution</b> |
|-----------------------------------------------------------------|------------------|------------------|-----------------|
| Anti-human IgA - Alkaline Phosphatase antibody produced in goat | SIGMA-Aldrich    | A9669            | 1:4000          |
| Mouse anti-human IgA1-AP                                        | Southern Biotech | 9130-04          | 1:4000          |
| Mouse anti-human IgA2-AP                                        | Southern Biotech | Sc-17803         | 1:4000          |
| Anti-Human IgG - Alkaline Phosphatase antibody produced in goat | SIGMA-Aldrich    | A9544-.25ML      | 1:4000          |
| Mouse Anti-Human IgG1 Fc-AP                                     | Southern Biotech | 9054-04          | 1:4000          |
| Mouse Anti-Human IgG2 Secondary antibody, AP                    | Invitrogen       | 05-3522          | 1:500           |
| Mouse Anti-Human IgG3 Secondary antibody, AP                    | Invitrogen       | 05-3622          | 1:1000          |
| Mouse Anti-Human IgG4 Fc-AP                                     | Southern Biotech | 9200-04          | 1:500           |

**Table S3. Differentially expressed proteins in psoriasis patients with low versus high anti-CA IgA levels.** Positive fold change values represent higher protein levels in the high IgA-CA group. Asterisks indicate proteins with >30% of values below the limit of detection.

| Protein                                      | Gene   | Uniprot ID | Fold Change | Raw P-value | FDR P-value |
|----------------------------------------------|--------|------------|-------------|-------------|-------------|
| Eosinophil cationic protein                  | RNASE3 | P12724     | 1.718       | 0.037       | 0.978       |
| Azurocidin                                   | AZU1   | P20160     | 1.507       | 0.035       | 0.978       |
| Chitinase-3-like protein 1                   | CHI3L1 | P36222     | 1.401       | 0.045       | 0.978       |
| Protein delta homolog 1                      | DLK1   | P80370     | 1.390       | 0.01        | 0.978       |
| C-C motif chemokine 18                       | CCL18  | P55774     | 1.370       | 0.006       | 0.978       |
| Carboxypeptidase B                           | CPB1   | P15086     | 1.347       | 0.007       | 0.978       |
| Ras GTPase-activating protein 1              | RASA1* | P20936     | 1.318       | 0.032       | 0.978       |
| Fc receptor-like B                           | FCRLB  | Q6BAA4     | 1.302       | 0.009       | 0.978       |
| NAD kinase 2, mitochondrial                  | NADK   | O95544     | 1.299       | 0.041       | 0.978       |
| Immunoglobulin lambda constant 2             | IGLC2  | P0CG05     | 1.274       | 0.009       | 0.978       |
| Fc receptor-like protein 5                   | FCRL5  | Q96RD9     | 1.268       | 0.011       | 0.978       |
| Alpha-(1,3)-fucosyltransferase 5             | FUT5   | Q11128     | 1.222       | 0.034       | 0.978       |
| Trypsin-2                                    | PRSS2  | P07478     | 1.220       | 0.028       | 0.978       |
| Procollagen C-endopeptidase enhancer 1       | PCOLCE | Q15113     | 1.217       | 0.047       | 0.978       |
| Secreted frizzled-related protein 3          | FRZB   | Q92765     | 1.206       | 0.038       | 0.978       |
| Angiotensinogen                              | ANG    | P03950     | 1.191       | 0.049       | 0.978       |
| Insulin-like growth factor-binding protein 7 | IGFBP7 | Q16270     | 1.167       | 0.042       | 0.978       |
| Intercellular adhesion molecule 3            | ICAM3  | P32942     | 1.144       | 0.045       | 0.978       |
| Beta-1,4-glucuronyltransferase 1             | B4GAT1 | O43505     | -1.117      | 0.025       | 0.978       |
| Brevican core protein                        | BCAN   | Q96GW7     | -1.171      | 0.037       | 0.978       |
| Fas Ligand                                   | FASLG  | P48023     | -1.175      | 0.039       | 0.978       |
| Vascular Endothelial Growth Factor D         | VEGFD  | O43915     | -1.179      | 0.016       | 0.978       |
| Receptor for Advanced Glycation Endproducts  | AGER   | Q15109     | -1.192      | 0.005       | 0.978       |
| Follistatin                                  | FST    | P19883     | -1.271      | 0.011       | 0.978       |
| Growth differentiation factor 2              | GDF2   | Q9UK05     | -1.377      | 0.033       | 0.978       |
| Fibroblast growth factor 2                   | FGF2*  | P09038     | -1.430      | 0.034       | 0.978       |
| Insulin-like growth factor-binding protein 1 | IGFBP1 | P08833     | -1.601      | 0.041       | 0.978       |
